# Supplementary material
Source: MDPI journal article supplement (https://www.mdpi.com/2077-1312/10/2/269)
Supplement: s1 [file s1]

## a) Response curves

### *Squatina oculata*

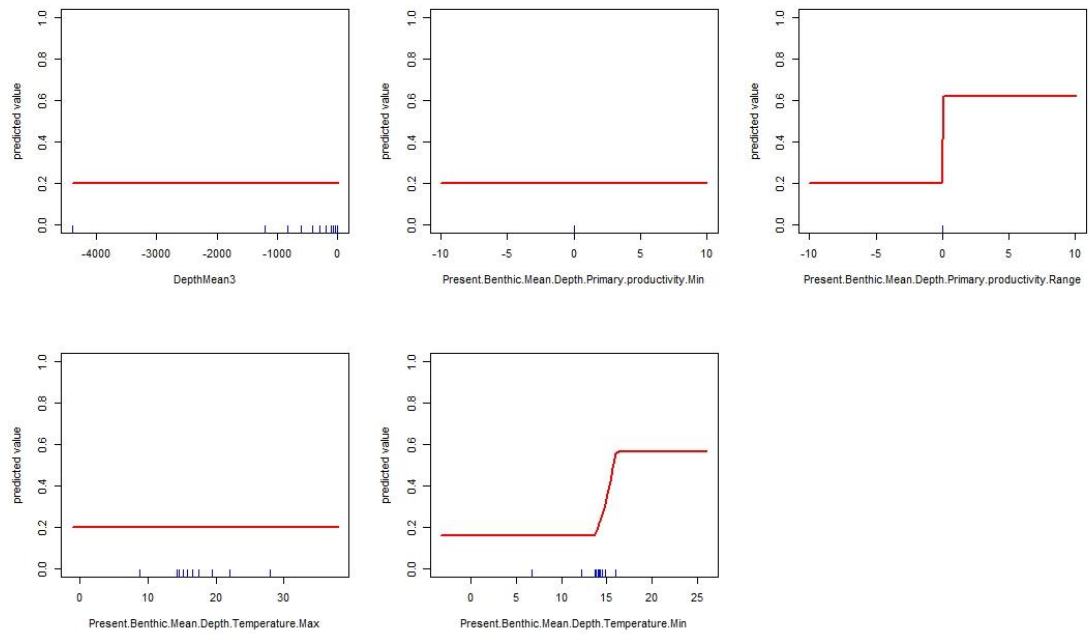

### *Squatina aculeata*

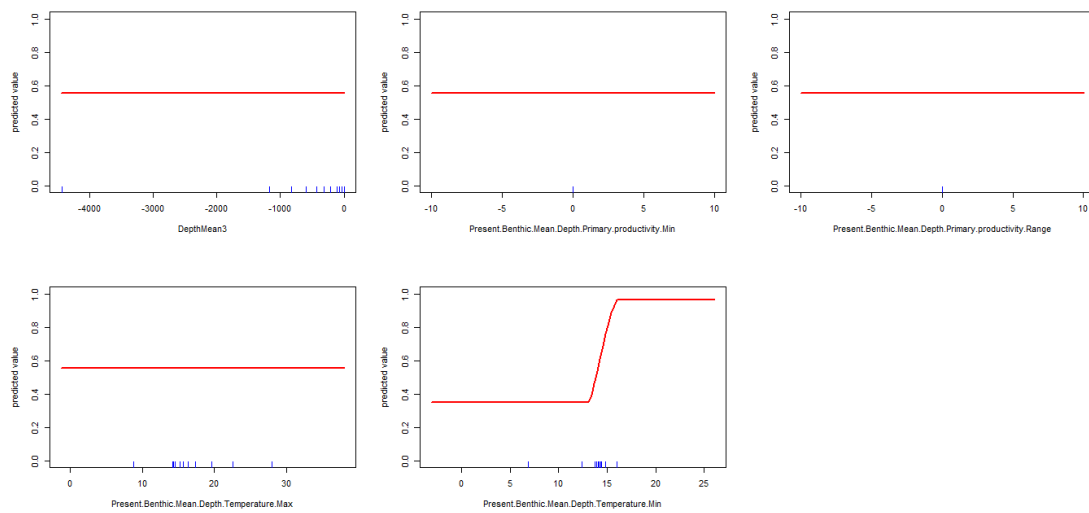

## *Squatina squatina*

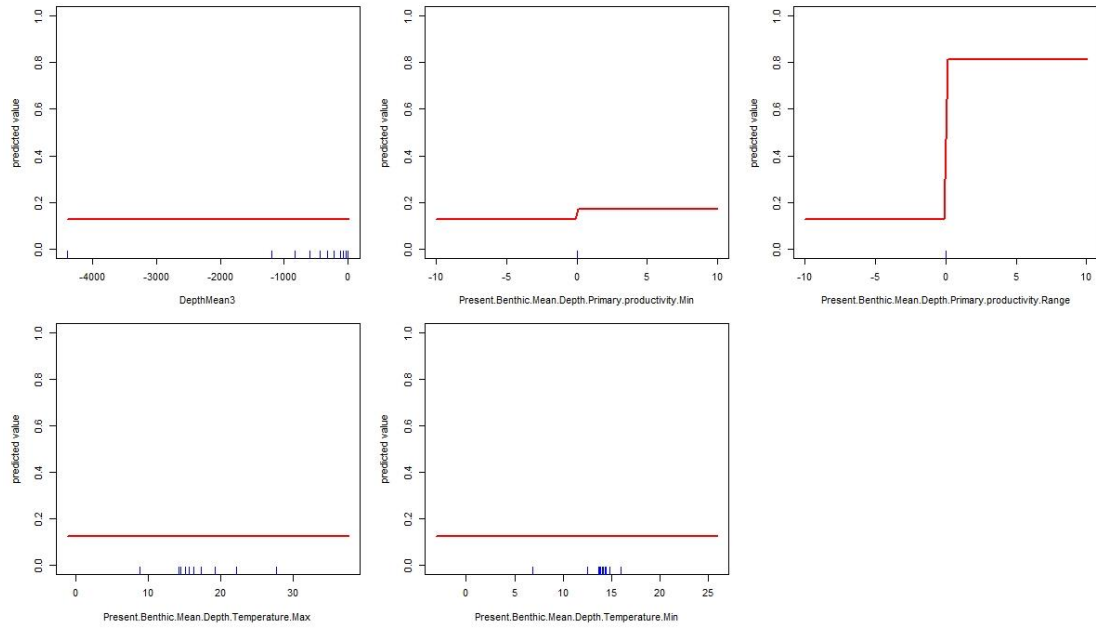

b) Variable importance

|                            | <i>Squatina oculata</i> |                        | <i>Squatina aculeata</i> |                        | <i>Squatina squatina</i> |                        |
|----------------------------|-------------------------|------------------------|--------------------------|------------------------|--------------------------|------------------------|
|                            | percent.contribution    | permutation.importance | percent.contribution     | permutation.importance | percent.contribution     | permutation.importance |
| Depth                      | 0                       | 0                      | 0                        | 0                      | 0                        | 0                      |
| Primary.productivity.Min   | 0                       | 0                      | 0                        | 0                      | 1.66                     | 3.76                   |
| Primary.productivity.Range | 74.27                   | 66.9                   | 0                        | 0                      | 98.33                    | 96.23                  |
| Depth.Temperature.Max      | 0                       | 0                      | 0                        | 0                      | 0                        | 0                      |
| Depth.Temperature.Min      | 25.72                   | 33.09                  | 100                      | 100                    | 0                        | 0                      |
